# Supplementary material for: Evaluation of the accuracy of shoe fitting in older people using three-dimensional foot scanning
Source: PubMed Central journal article supplement (PMC3903039; doi:10.1186/1757-1146-7-3), 2014-01-23
Supplement: 1757-1146-7-3-S1.pdf [file 1757-1146-7-3-S1.pdf]

 On/Off

<< < > >>

 

 New Color

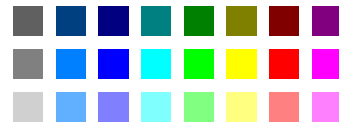

 Move

 Reset

  

 Flip

Explode / Move Parts
